# Supplementary material
Source: publisher figshare collection journal article supplement (https://tandf.figshare.com/ndownloader/files/14150612)
Supplement: Supplementary file 1 [file 14150612]

Supplementary information

| *STEM evaluation studies which met the inclusion criteria, (n=119)* | | |
| --- | --- | --- |
| Post-test only or correlational design (30,3%) | | |
| Alonso, Manrique, Martinez, and Vines (2011) | Kong, Dabney, and Tai (2014) | |
| Autenrieth, Lewis, and Butler-Purry (2017) | Kose and Arslan (2016) | |
| Bowling, Doyle, Taylor, and Antes (2015) | Laugerman, Shelley, Mickelson, and Rover (2013) | |
| Bunting and Cheville (2009) | Maltby, Brooks, Horton, and Morgan (2016) | |
| Carnes et al. (2012) | Mantri, Dutt, Gupta, and Chitkara (2008) | |
| Christensen, Knezek, and Overall (2005) | Monroe, Mailander, and Lima (2006) | |
| Constan and Spicer (2015) | Mosley, Liu, Hargrove, and Doswell (2010) | |
| Drane, Micari, and Light (2014) | Murphy, Gaughan, Hume, and Moore (2010) | |
| Finkel (2017) | Page, Lewis, Autenrieth, and Butler-Purry (2013) | |
| Franchetti (2012) | Ricks, Richardson, Stern, Taylor, and Taylor (2014) | |
| Gilliam et al. (2017) | Smaill (2010) | |
| Hernandez, Schultz, Estrada, Woodcock, and Chance (2013) | Soldner, Rowan-Kenyon, Inkelas, Garvey, and Robbins (2012) | |
| Hockings, DeAngelis, and Frey (2008) | Steinke et al. (2006) | |
| Jones, Epler, Mokri, Bryant, and Paretti (2013) | Wamser (2006) | |
| Junge, Quinones, Kakietek, Teodorescu, and Marsteller (2010) | Yelamarthi and Mawasha (2008) | |
| Kaila, Kurvinen, Lokkila, and Laakso (2016) | Yelamarthi and Mawasha (2010) | |
| Khan and Gogos (2013) | Yilmaz, Ren, Custer, and Coleman (2010) | |
| Koenig, Schen, Edwards, and Bao (2012) |  | |
| Pre/post-test design without comparable comparison groups (39,5%) | | |
| Anthony, Greene, Post, Parkhurst, and Zhan (2016) | Konur, Şeyihoǧlu, Sezen, and Tekbiyik (2011) | |
| Archer, DeWitt, and Dillon (2014) | Lam, Srivatsan, Doverspike, Vesalo, and Mawasha (2005) | |
| Bachman, Bischoff, Gallagher, Labroo, and Schaumloffel (2008) | Lenaburg, Aguirre, Goodchild, and Kuhn (2012) | |
| Ball, Huang, Cotten, and Rikard (2017) | Levy and Li (2013) | |
| Berk et al. (2014) | Madihally and Maase (2006) | |
| Bhattacharyya, Mead, and Nathaniel (2011) | Martin et al. (2011) | |
| Binns, Polly, Conrad, and Algozzine (2016) | Martinez, Lindline, Petronis, and Pilotti (2012) | |
| Bugallo, Kelly, and Ha (2015) | Mink and Fraser (2005) | |
| Chan et al. (2010) | Mohr-Schroeder et al. (2014) | |
| Chen et al. (2016) | Nadelson and Callahan (2011) | |
| Dave et al. (2010) | Nugent, Barker, Grandgenett, and Welch (2016) | |
| Doerschuk et al. (2016) | Ojha and Hill (2012) | |
| Dougherty, Oliver, and Fergusson (2014) | Patchen, Zhang, and Barnett (2017) | |
| Duran, Hoft, Lawson, Medjahed, and Orady (2014) | Peterman, Kermish-Allen, Knezek, Christensen, and Tyler-Wood (2016) | |
| Egbue, Long, and Ng (2015) | Roberts (2014) | |
| Gilmer (2006) | Sasson and Cohen (2013) | |
| Hayden, Ouyang, Scinski, Olszewski, and Bielefeldt (2011) | Stake and Mares (2005) | |
| Herman, Goldberg, Trenshaw, Somerville, and Stolk (2017) | Sterling, Matkins, Frazier, and Logerwell (2007) | |
| Hirsch, Berliner-Heyman, and Cusack (2017) | Stevens, Andrade, and Page (2016) | |
| Holmes, Redmond, Thomas, and High (2012) | Tseng, Chang, Lou, and Chen (2013) | |
| Huziak-Clark, Sondergeld, Staaden, Knaggs, and Bullerjahn (2015) | Wallace, Perry, Ferguson, and Jackson (2015) | |
| Huziak-Clark, van Staden, and Bullerjahn (2014) | Xie and Reider (2014) | |
| Kim (2011) | Yanowitz (2016) | |
| Kim (2016) |  | |
| Case study or mixed method with pre/post-design or post-only design 5,0% | | |
| Dickerson, Eckhoff, Stewart, Chappell, and Hathcock (2014) | | Scott (2012) |
| Eagan et al. (2013) | | Stolle-McAllister, Domingo, and Carrillo (2011) |
| Scogin (2016) | | Tuffley and Antonio (2013) |
| Quasi-experimental design (21,8%) | | |
| Akcay and Akcay (2015) | | McGonagle et al. (2014) |
| Baiduc, Drane, Beitel, and Flores (2017) | | Moreno, Tharp, Vogt, Newell, and Burnett (2016) |
| Bamberger (2014) | | Nugent et al. (2016) |
| Bilgin (2006) | | Prokop, Tuncer, and Kvasnicak (2007)* |
| Boelter, Link, Perry, and Leukefeld (2015) | | Sancho, Torrente, and Fernandez-Manjon (2012) |
| Cincera, Medek, Cincera, Lupac, and Ticha (2017) | | Schultz et al. (2011)* |
| Hall, Foutz, and Mayhew (2013) | | Smith and Monk (2005) |
| Kahveci, Southerland, and Gilmer (2006) | | Stoeger et al. (2016)* |
| Kara and Yesilyurt (2008)* | | Stout, Dasgupta, Hunsinger, and McManus (2011)* |
| Kilincaslan and Simsek (2015) | | Tofel-Grehl et al. (2017) |
| Leonard et al. (2016) | | Tyler-Wood, Ellison, Lim, and Periathiruvadi (2012) |
| Lee and Erdogan (2007)* | | Winkleby et al. (2014) |
| Malik et al. (2010) | | Zahorec, Haskova, and Bilek (2014) |
| Experimental design (3,4%) | | |
| Bekki, Smith, Bernstein, and Harrison (2013)* | | Harackiewicz, Rozek, Hulleman, and Hyde (2012)* |
| Gaspard et al. (2015)* | | Ruthven et al. (2017) |

Note: Studies with * are part of the final selection.

References

Akcay, B., & Akcay, H. (2015). Effectiveness of Science-Technology-Society (STS) Instruction on Student Understanding of the Nature of Science and Attitudes toward Science. *International Journal of Education in Mathematics, Science and Technology, 3*(1), 37-45.

Alonso, F., Manrique, D., Martinez, L., & Vines, J. M. (2011). How Blended Learning Reduces Underachievement in Higher Education: An Experience in Teaching Computer Sciences. *IEEE Transactions on Education, 54*(3), 471-478.

Anthony, A. B., Greene, H., Post, P. E., Parkhurst, A., & Zhan, X. (2016). Preparing university students to lead K-12 engineering outreach programmes: a design experiment. *European Journal of Engineering Education, 41*(6), 623-637. doi:10.1080/03043797.2015.1121467

Archer, L., DeWitt, J., & Dillon, J. (2014). "It Didn't Really Change My Opinion": Exploring What Works, What Doesn't and Why in a School Science, Technology, Engineering and Mathematics Careers Intervention. *Research in Science & Technological Education, 32*(1), 35-55.

Autenrieth, R. L., Lewis, C. W., & Butler-Purry, K. L. (2017). Long-Term Impact of the Enrichment Experiences in Engineering (E[superscript 3]) Summer Teacher Program. *Journal of STEM Education: Innovations and Research, 18*(1), 25-31.

Bachman, N. J., Bischoff, P. J., Gallagher, H., Labroo, S., & Schaumloffel, J. C. (2008). PR[superscript 2]EPS: Preparation, Recruitment, Retention and Excellence in the Physical Sciences, Including Engineering. A Report on the 2004, 2005 and 2006 Science Summer Camps. *Journal of STEM Education: Innovations and Research, 9*(1-2), 30-39.

Baiduc, R. R., Drane, D., Beitel, G. J., & Flores, L. C. (2017). A Research Preparatory Program for First-Year College Students: Student Selection and Preparation Lead to Persistence in Research. *Innovative Higher Education, 42*(3), 269-284.

Ball, C., Huang, K. T., Cotten, S. R., & Rikard, R. V. (2017). Pressurizing the STEM Pipeline: an Expectancy-Value Theory Analysis of Youths’ STEM Attitudes. *Journal of Science Education and Technology, 26*(4), 372-382. doi:10.1007/s10956-017-9685-1

Bamberger, Y. M. (2014). Encouraging Girls into Science and Technology with Feminine Role Model: Does This Work? *Journal of Science Education and Technology, 23*(4), 549-561. doi:10.1007/s10956-014-9487-7

Bekki, J. M., Smith, M. L., Bernstein, B. L., & Harrison, C. (2013). Effects of an online personal resilience training program for women in stem doctoral programs. *Journal of Women and Minorities in Science and Engineering, 19*(1), 17-35. doi:10.1615/JWomenMinorScienEng.2013005351

Berk, L. J., Muret-Wagstaff, S. L., Goyal, R., Joyal, J. A., Gordon, J. A., Faux, R., & Oriol, N. E. (2014). Inspiring Careers in STEM and Healthcare Fields through Medical Simulation Embedded in High School Science Education. *Advances in Physiology Education, 38*(3), 210-215.

Bhattacharyya, S., Mead, T. P., & Nathaniel, R. (2011). The Influence of Science Summer Camp on African-American High School Students' Career Choices. *School Science and Mathematics, 111*(7), 345-353.

Bilgin, I. (2006). The effects of hands-on activities incorporating a cooperative learning approach on eight grade students’ science process skills and attitudes toward science. *Journal of Baltic Science Education, 1*(9), 27-37.

Binns, I. C., Polly, D., Conrad, J., & Algozzine, B. (2016). Student Perceptions of a Summer Ventures in Science and Mathematics Camp Experience. *School Science and Mathematics, 116*(8), 420-429. doi:10.1111/ssm.12196

Boelter, C., Link, T. C., Perry, B. L., & Leukefeld, C. (2015). Diversifying the STEM Pipeline. *Journal of Education for Students Placed at Risk, 20*(3), 218-237.

Bowling, B., Doyle, M., Taylor, J., & Antes, A. (2015). Professionalizing the Role of Peer Leaders in STEM. *Journal of STEM Education: Innovations and Research, 16*(2), 30-39.

Bugallo, M. F., Kelly, A. M., & Ha, M. (2015). Impact of a university-based electrical and computer engineering summer program for high school students. *International Journal of Engineering Education, 31*(5), 1419-1427.

Bunting, C. F., & Cheville, R. A. (2009). VECTOR: A Hands-On Approach that Makes Electromagnetics Relevant to Students. *IEEE Transactions on Education, 52*(3), 350-359.

Carnes, M., Devine, P. G., Isaac, C., Manwell, L. B., Ford, C. E., Byars-Winston, A., . . . Sheridan, J. (2012). Promoting Institutional Change through Bias Literacy. *Journal of Diversity in Higher Education, 5*(2), 63-77.

Chan, Y. Y., Hui, D., Dickinson, A. R., Chu, D., Cheng, D. K. W., Cheung, E., . . . Luk, K. M. (2010). Engineering outreach: A successful initiative with gifted students in science and technology in Hong Kong. *IEEE Transactions on Education, 53*(1), 158-171. doi:10.1109/TE.2009.2030178

Chen, J. A., Tutwiler, M. S., Metcalf, S. J., Kamarainen, A., Grotzer, T., & Dede, C. (2016). A multi-user virtual environment to support students' self-efficacy and interest in science: A latent growth model analysis. *Learning and Instruction, 41*, 11-22. doi:10.1016/j.learninstruc.2015.09.007

Christensen, R., Knezek, G., & Overall, T. (2005). Transition points for the gender gap in computer enjoyment. *Journal of Research on Technology in Education, 38*(1), 23-37. doi:10.1080/15391523.2005.10782448

Cincera, J., Medek, M., Cincera, P., Lupac, M., & Ticha, I. (2017). What science is about - development of the scientific understanding of secondary school students. *Research in Science & Technological Education, 35*(2), 183-194. doi:10.1080/02635143.2017.1285760

Constan, Z., & Spicer, J. J. (2015). Maximizing Future Potential in Physics and STEM: Evaluating a Summer Program through a Partnership between Science Outreach and Education Research. *Journal of Higher Education Outreach and Engagement, 19*(2), 117-136.

Dave, V., Blasko, D., Holliday-Darr, K., Kremer, J. T., Edwards, R., Ford, M., . . . Hido, B. (2010). Re-enJEANeering STEM Education: Math Options Summer Camp. *Journal of Technology Studies, 36*(1), 35-45.

Dickerson, D. L., Eckhoff, A., Stewart, C. O., Chappell, S., & Hathcock, S. (2014). The Examination of a Pullout STEM Program for Urban Upper Elementary Students. *Research in Science Education, 44*(3), 483-506. doi:10.1007/s11165-013-9387-5

Doerschuk, P., Bahrim, C., Daniel, J., Kruger, J., Mann, J., & Martin, C. (2016). Closing the Gaps and Filling the STEM Pipeline: A Multidisciplinary Approach. *Journal of Science Education and Technology, 25*(4), 682-695.

Dougherty, K., Oliver, C., & Fergusson, J. (2014). Pathways to space: A mission to foster the next generation of scientists and engineers. *Acta Astronautica, 99*, 184-192. doi:10.1016/j.actaastro.2014.01.026

Drane, D., Micari, M., & Light, G. (2014). Students as Teachers: Effectiveness of a Peer-Led STEM Learning Programme over 10 Years. *Educational Research and Evaluation, 20*(3), 210-230.

Duran, M., Hoft, M., Lawson, D. B., Medjahed, B., & Orady, E. A. (2014). Urban High School Students' IT/STEM Learning: Findings from a Collaborative Inquiry- and Design-Based Afterschool Program. *Journal of Science Education and Technology, 23*(1), 116-137. doi:10.1007/s10956-013-9457-5

Eagan, M. K., Hurtado, S., Chang, M. J., Garcia, G. A., Herrera, F. A., & Garibay, J. C. (2013). Making a Difference in Science Education: The Impact of Undergraduate Research Programs. *American Educational Research Journal, 50*(4), 683-713. doi:10.3102/0002831213482038

Egbue, O., Long, S., & Ng, E.-H. (2015). Charge It! Translating Electric Vehicle Research Results to Engage 7th and 8th Grade Girls. *Journal of Science Education and Technology, 24*(5), 663-670.

Finkel, L. (2017). Walking the Path Together from High School to STEM Majors and Careers: Utilizing Community Engagement and a Focus on Teaching to Increase Opportunities for URM Students. *Journal of Science Education and Technology, 26*(1), 116-126. doi:10.1007/s10956-016-9656-y

Franchetti, M. (2012). An Analysis of Retention Programs for Female Students in Engineering at the University of Toledo. *Journal of Pre-College Engineering Education Research, 2*(1), 21-27.

Gaspard, H., Dicke, A. L., Flunger, B., Brisson, B. M., Hafner, I., Nagengast, B., & Trautwein, U. (2015). Fostering adolescents' value beliefs for mathematics with a relevance intervention in the classroom. *Developmental Psychology, 51*(9), 1226-1240. doi:10.1037/dev0000028

Gilliam, M., Jagoda, P., Fabiyi, C., Lyman, P., Wilson, C., Hill, B., & Bouris, A. (2017). Alternate Reality Games as an Informal Learning Tool for Generating STEM Engagement among Underrepresented Youth: a Qualitative Evaluation of the Source. *Journal of Science Education and Technology, 26*(3), 295-308. doi:10.1007/s10956-016-9679-4

Gilmer, C. (2006). *An Understanding of the Improved Grades, Retention and Graduation Rates of STEM Majors at the Academic Investment in Math and Science (AIMS) Program of Bowling Green State University (BGSU)* (Vol. 8).

Hall, M. K., Foutz, S., & Mayhew, M. A. (2013). Design and Impacts of a Youth-Directed Café Scientifique Program. *International Journal of Science Education, Part B: Communication and Public Engagement, 3*(2), 175-198.

Harackiewicz, J. M., Rozek, C. S., Hulleman, C. S., & Hyde, J. S. (2012). Helping Parents to Motivate Adolescents in Mathematics and Science: An Experimental Test of a Utility-Value Intervention. *Psychological Science, 23*(8), 899-906. doi:10.1177/0956797611435530

Hayden, K., Ouyang, Y., Scinski, L., Olszewski, B., & Bielefeldt, T. (2011). Increasing Student Interest and Attitudes in STEM: Professional Development and Activities to Engage and Inspire Learners. *Contemporary Issues in Technology and Teacher Education (CITE Journal), 11*(1), 47-69.

Herman, G. L., Goldberg, D. E., Trenshaw, K. F., Somerville, M., & Stolk, J. (2017). The Intrinsic-Motivation Course Design Method. *International Journal of Engineering Education, 33*(2), 558-574.

Hernandez, P. R., Schultz, P. W., Estrada, M., Woodcock, A., & Chance, R. C. (2013). Sustaining Optimal Motivation: A Longitudinal Analysis of Interventions to Broaden Participation of Underrepresented Students in STEM. *Journal of Educational Psychology, 105*(1), 89-107.

Hirsch, L. S., Berliner-Heyman, S., & Cusack, J. L. (2017). Introducing middle school students to engineering principles and the engineering design process through an academic summer program. *International Journal of Engineering Education, 33*(1), 398-407.

Hockings, S. C., DeAngelis, K. J., & Frey, R. F. (2008). Peer-led team learning in general chemistry: Implementation and evaluation. *Journal of Chemical Education, 85*(7), 990-996. doi:DOI 10.1021/ed085p990

Holmes, S., Redmond, A., Thomas, J., & High, K. (2012). Girls Helping Girls: Assessing the Influence of College Student Mentors in an Afterschool Engineering Program. *Mentoring & Tutoring: Partnership in Learning, 20*(1), 137-150.

Huziak-Clark, T., Sondergeld, T., Staaden, M., Knaggs, C., & Bullerjahn, A. (2015). Assessing the Impact of a Research-Based STEM Program on STEM Majors' Attitudes and Beliefs. *School Science and Mathematics, 115*(5), 226-236.

Huziak-Clark, T., van Staden, M., & Bullerjahn, A. (2014). The impact of the Science, Engineering and Technology Gateway of Ohio (SETGO) program mentoring on student attitude changes and retention. *American International Journal of Social Science, 3*(2), 18-27.

Jones, B. D., Epler, C. M., Mokri, P., Bryant, L. H., & Paretti, M. C. (2013). The Effects of a Collaborative Problem-Based Learning Experience on Students' Motivation in Engineering Capstone Courses. *Interdisciplinary Journal of Problem-based Learning, 7*(2), 34-71.

Junge, B., Quinones, C., Kakietek, J., Teodorescu, D., & Marsteller, P. (2010). Promoting Undergraduate Interest, Preparedness, and Professional Pursuit in the Sciences: An Outcomes Evaluation of the SURE Program at Emory University. *Cbe-Life Sciences Education, 9*(2), 119-132. doi:10.1187/cbe.09-08-0057

Kahveci, A., Southerland, S. A., & Gilmer, P. J. (2006). Retaining Undergraduate Women in Science, Mathematics, and Engineering. *Journal of College Science Teaching, 36*(3-), 34-38.

Kaila, E., Kurvinen, E., Lokkila, E., & Laakso, M. J. (2016). Redesigning an Object-Oriented Programming Course. *ACM Transactions on Computing Education, 16*(4). doi:10.1145/2906362

Kara, Y., & Yesilyurt, S. (2008). Comparing the impacts of tutorial and edutainment software programs on students' achievements, misconceptions, and attitudes towards biology. *Journal of Science Education and Technology, 17*(1), 32-41. doi:10.1007/s10956-007-9077-z

Khan, R., & Gogos, A. (2013). Online Mentoring for Biotechnology Graduate Students: An Industry-Academia Partnership. *Journal of Asynchronous Learning Networks, 17*(1), 89-107.

Kilincaslan, H., & Simsek, P. O. (2015). Effects of Curriculum Layered and Creative Drama Methods on 6th Grade "Force and Motion" Unit on Achievement, Attitude and Retention. *Egitim Ve Bilim-Education and Science, 40*(180), 217-245. doi:10.15390/eb.2015.4380

Kim, H. (2011). Inquiry-Based Science and Technology Enrichment Program: Green Earth Enhanced with Inquiry and Technology. *Journal of Science Education and Technology, 20*(6), 803-814.

Kim, H. (2016). Inquiry-Based Science and Technology Enrichment Program for Middle School-Aged Female Students. *Journal of Science Education and Technology, 25*(2), 174-186.

Koenig, K., Schen, M., Edwards, M., & Bao, L. (2012). Addressing STEM Retention through a Scientific Thought and Methods Course. *Journal of College Science Teaching, 41*(4), 23-29.

Kong, X., Dabney, K. P., & Tai, R. H. (2014). The Association between Science Summer Camps and Career Interest in Science and Engineering. *International Journal of Science Education, Part B: Communication and Public Engagement, 4*(1), 54-65.

Konur, K. B., Şeyihoǧlu, A., Sezen, G., & Tekbiyik, A. (2011). Evaluation of a science camp: Enjoyable discovery of mysterious world. *Kuram ve Uygulamada Egitim Bilimleri, 11*(3), 1602-1607.

Kose, U., & Arslan, A. (2016). Intelligent E-Learning System for Improving Students' Academic Achievements in Computer Programming Courses. *International Journal of Engineering Education, 32*(1), 185-198.

Lam, P. C., Srivatsan, T., Doverspike, D., Vesalo, J., & Mawasha, P. R. (2005). A Ten Year Assessment of the Pre-Engineering Program for Under-Represented, Low Income and/or First Generation College Students at the University of Akron. *Journal of STEM Education: Innovations and Research, 6*(3-4), 14-20.

Laugerman, M., Shelley, M., Mickelson, S. K., & Rover, D. T. (2013). The engineering admissions partnership program: A navigation strategy for community college students seeking a pathway into engineering. *International Journal of Engineering Education, 29*(5), 1260-1269.

Lee, M. K., & Erdogan, I. (2007). The effect of Science-Technology-Society teaching on students' attitudes toward Science and certain aspects of creativity. *International Journal of Science Education, 29*(11), 1315-1327. doi:10.1080/09500690600972974

Lenaburg, L., Aguirre, O., Goodchild, F., & Kuhn, J.-U. (2012). Expanding Pathways: A Summer Bridge Program for Community College STEM Students. *Community College Journal of Research and Practice, 36*(3), 153-168.

Leonard, J., Buss, A., Gamboa, R., Mitchell, M., Fashola, O. S., Hubert, T., & Almughyirah, S. (2016). Using Robotics and Game Design to Enhance Children’s Self-Efficacy, STEM Attitudes, and Computational Thinking Skills. *Journal of Science Education and Technology, 25*(6), 860-876. doi:10.1007/s10956-016-9628-2

Levy, A. J., & Li, W. (2013). Adaption of the Clinical Correlation Instructional Model for 2nd Year Engineering Science Courses. *International Journal of Engineering Education, 29*(5), 1144-1154.

Madihally, S. V., & Maase, E. L. (2006). Biomedical and Biochemical Engineering for K-12 Students. *Chemical Engineering Education, 40*(4).

Malik, Q., Koehler, M. J., Mishra, P., Buch, N., Shanblatt, M., & Pierce, S. J. (2010). Understanding student attitudes in a freshman design sequence. *International Journal of Engineering Education, 26*(5), 1179-1191.

Maltby, J. L., Brooks, C., Horton, M., & Morgan, H. (2016). Long Term Benefits for Women in a Science, Technology, Engineering, and Mathematics Living-Learning Community. *Learning Communities: Research & Practice, 4*(1).

Mantri, A., Dutt, S., Gupta, J. P., & Chitkara, M. (2008). Design and evaluation of a PBL-based course in analog electronics. *IEEE Transactions on Education, 51*(4), 432-438. doi:10.1109/TE.2007.912525

Martin, F. G., Scribner-MacLean, M., Christy, S., Rudnicki, I., Londhe, R., Manning, C., & Goodman, I. F. (2011). Reflections on iCODE: Using web technology and hands-on projects to engage urban youth in computer science and engineering. *Autonomous Robots, 30*(3), 265-280. doi:10.1007/s10514-011-9218-3

Martinez, E., Lindline, J., Petronis, M. S., & Pilotti, M. (2012). Effectiveness of a Science Agricultural Summer Experience (SASE) in Recruiting Students to Natural Resources Management. *Journal of Science Education and Technology, 21*(6), 713-721. doi:10.1007/s10956-011-9359-3

McGonagle, A. K., Freake, H. C., Zinn, S., Bauerle, T., Winston, J., Lewicki, G., . . . Philion, M. (2014). Evaluation of STRONG-CT: A Program Supporting Minority and First-Generation U.S. Science Students. *Journal of STEM Education: Innovations and Research, 15*(1), 52-61.

Mink, D. V., & Fraser, B. J. (2005). Evaluation of a K-5 Mathematics Program Which Integrates Children's Literature: Classroom Environment and Attitudes. *International Journal of Science and Mathematics Education, 3*(1), 59-85.

Mohr-Schroeder, M. J., Jackson, C., Miller, M., Walcott, B., Little, D. L., Speler, L., . . . Schroeder, D. C. (2014). Developing Middle School Students' Interests in STEM via Summer Learning Experiences: See Blue STEM Camp. *School Science and Mathematics, 114*(6), 291-301.

Monroe, W. T., Mailander, M., & Lima, M. (2006). Focus on experiential education: A freshman engineering program in Biological Engineering. *International Journal of Engineering Education, 22*(6), 1129-1138.

Moreno, N. P., Tharp, B. Z., Vogt, G., Newell, A. D., & Burnett, C. A. (2016). Preparing Students for Middle School Through After-School STEM Activities. *Journal of Science Education and Technology, 25*(6), 889-897. doi:10.1007/s10956-016-9643-3

Mosley, P. H., Liu, Y., Hargrove, S. K., & Doswell, J. T. (2010). A Pre-Engineering Program Using Robots to Attract Underrepresented High School and Community College Students. *Journal of STEM Education: Innovations and Research, 11*(5-6), 44-54.

Murphy, T. E., Gaughan, M., Hume, R., & Moore, S. G. (2010). College Graduation Rates for Minority Students in a Selective Technical University: Will Participation in a Summer Bridge Program Contribute to Success? *Educational Evaluation and Policy Analysis, 32*(1), 70-83.

Nadelson, L. S., & Callahan, J. M. (2011). A Comparison of Two Engineering Outreach Programs for Adolescents. *Journal of STEM Education: Innovations and Research, 12*(1-2), 43-54.

Nugent, G., Barker, B., Grandgenett, N., & Welch, G. (2016). Robotics camps, clubs, and competitions: Results from a US robotics project. *Robotics and Autonomous Systems, 75*(Part B), 686-691. doi:10.1016/j.robot.2015.07.011

Ojha, A., & Hill, S. (2012). The Space Academy: Going beyond "Inspiration"--A Pioneering Model for Science Education. *School Science Review, 93*(344), 33-39.

Page, C. A., Lewis, C. W., Autenrieth, R. L., & Butler-Purry, K. L. (2013). Enrichment Experiences in Engineering (E[superscript 3]) for Teachers Summer Research Program: An Examination of Mixed-Method Evaluation Findings on High School Teacher Implementation of Engineering Content in High School STEM Classrooms. *Journal of STEM Education: Innovations and Research, 14*(3), 27-33.

Patchen, A. K., Zhang, L., & Barnett, M. (2017). Growing Plants and Scientists: Fostering Positive Attitudes toward Science among All Participants in an Afterschool Hydroponics Program. *Journal of Science Education and Technology, 26*(3), 279-294. doi:10.1007/s10956-016-9678-5

Peterman, K., Kermish-Allen, R., Knezek, G., Christensen, R., & Tyler-Wood, T. (2016). Measuring Student Career Interest within the Context of Technology-Enhanced STEM Projects: A Cross-Project Comparison Study Based on the Career Interest Questionnaire. *Journal of Science Education and Technology, 25*(6), 833-845. doi:10.1007/s10956-016-9617-5

Prokop, P., Tuncer, G., & Kvasnicak, R. (2007). Short-term effects of field programme on students' knowledge and attitude toward biology: A slovak experience. *Journal of Science Education and Technology, 16*(3), 247-255.

Ricks, K. G., Richardson, J. A., Stern, H. P., Taylor, R. P., & Taylor, R. A. (2014). An Engineering Learning Community to Promote Retention and Graduation of At-Risk Engineering Students. *American Journal of Engineering Education, 5*(2), 73-90.

Roberts, S. J. (2014). ENGage: The use of space and pixel art for increasing primary school children's interest in science, technology, engineering and mathematics. *Acta Astronautica, 93*, 34-44. doi:10.1016/j.actaastro.2013.06.013

Ruthven, K., Mercer, N., Taber, K. S., Guardia, P., Hofmann, R., Ilie, S., . . . Riga, F. (2017). A research-informed dialogic-teaching approach to early secondary school mathematics and science: the pedagogical design and field trial of the epiSTEMe intervention. *Research Papers in Education, 32*(1), 18-40. doi:10.1080/02671522.2015.1129642

Sancho, P., Torrente, J., & Fernandez-Manjon, B. (2012). MareMonstrum: a Contribution to Empirical Research about How the Use of MUVEs May Improve Students' Motivation. *Journal of Universal Computer Science, 18*(18), 2576-2598.

Sasson, I., & Cohen, D. (2013). Assessment for Effective Intervention: Enrichment Science Academic Program. *Journal of Science Education and Technology, 22*(5), 718-728. doi:10.1007/s10956-012-9425-5

Schultz, W. P., Hernandez, P. R., Woodcock, A., Estrada, M., Chance, R. C., Aguilar, M., & Serpe, R. T. (2011). Patching the pipeline: Reducing educational disparities in the sciences through minority training programs. *Educational Evaluation and Policy Analysis, 33*(1), 95-114.

Scogin, S. C. (2016). Identifying the Factors Leading to Success: How an Innovative Science Curriculum Cultivates Student Motivation. *Journal of Science Education and Technology, 25*(3), 375-393. doi:10.1007/s10956-015-9600-6

Scott, C. (2012). An investigation of science, technology, engineering and mathematics (STEM) focused high schools in the US. *Journal of STEM Education: Innovations and Research, 13*(5), 30.

Smaill, C. R. (2010). The Implementation and Evaluation of a University-Based Outreach Laboratory Program in Electrical Engineering. *IEEE Transactions on Education, 53*(1), 12-17. doi:10.1109/te.2009.2022323

Smith, N., & Monk, M. (2005). Attracting tomorrow’s engineers: an evaluation of a scheme to enhance recruitment into engineering. *European Journal of Engineering Education, 30*(2), 233-243. doi:10.1080/09603120500115314

Soldner, M., Rowan-Kenyon, H., Inkelas, K. K., Garvey, J., & Robbins, C. (2012). Supporting Students' Intentions to Persist in STEM Disciplines: The Role of Living-Learning Programs among other Social-Cognitive Factors. *The Journal of Higher Education, 83*(3), 311-336. doi:10.1080/00221546.2012.11777246

Stake, J. E., & Mares, K. R. (2005). Evaluating the impact of science-enrichment programs on adolescents' science motivation and confidence: The splashdown effect. *Journal of Research in Science Teaching, 42*(4), 359-375. doi:10.1002/tea.20052

Steinke, J., Lapinski, M., Zietsman-Thomas, A., Nwulu, P., Crocker, N., Williams, Y., . . . Kuchibhotla, S. (2006). Middle school-aged children's attitudes toward women in science, engineering, and technology and the effects of media literacy training. *Journal of Women and Minorities in Science and Engineering, 12*(4), 295-323. doi:10.1615/JWomenMinorScienEng.v12.i4.30

Sterling, D. R., Matkins, J. J., Frazier, W. M., & Logerwell, M. G. (2007). Science Camp as a Transformative Experience for Students, Parents, and Teachers in the Urban Setting. *School Science and Mathematics, 107*(4), 134-147. doi:doi:10.1111/j.1949-8594.2007.tb17928.x

Stevens, S., Andrade, R., & Page, M. (2016). Motivating Young Native American Students to Pursue STEM Learning Through a Culturally Relevant Science Program. *Journal of Science Education and Technology, 25*(6), 947-960. doi:10.1007/s10956-016-9629-1

Stoeger, H., Schirner, S., Laemmle, L., Obergriesser, S., Heilemann, M., & Ziegler, A. (2016). A contextual perspective on talented female participants and their development in extracurricular STEM programs. *Beyond the Iq Test, 1377*, 53-66. doi:10.1111/nyas.13116

Stolle-McAllister, K., Domingo, M. R. S., & Carrillo, A. (2011). The Meyerhoff Way: How the Meyerhoff Scholarship Program Helps Black Students Succeed in the Sciences. *Journal of Science Education and Technology, 20*(1), 5-16. doi:10.1007/s10956-010-9228-5

Stout, J. G., Dasgupta, N., Hunsinger, M., & McManus, M. A. (2011). STEMing the tide: Using ingroup experts to inoculate women's self-concept in science, technology, engineering, and mathematics (STEM). *Journal of Personality and Social Psychology, 100*(2), 255-270. doi:10.1037/a0021385

Tofel-Grehl, C., Fields, D., Searle, K., Maahs-Fladung, C., Feldon, D., Gu, G., & Sun, C. (2017). Electrifying Engagement in Middle School Science Class: Improving Student Interest Through E-textiles. *Journal of Science Education and Technology, 26*(4), 406-417. doi:10.1007/s10956-017-9688-y

Tseng, K. H., Chang, C. C., Lou, S. J., & Chen, W. P. (2013). Attitudes towards science, technology, engineering and mathematics (STEM) in a project-based learning (PjBL) environment. *International Journal of Technology and Design Education, 23*(1), 87-102. doi:10.1007/s10798-011-9160-x

Tuffley, D., & Antonio, A. (2013). First Year Engagement & Retention: A Goal-Setting Approach. *Journal of Information Technology Education: Innovations in Practice, 12*, 239-251.

Tyler-Wood, T., Ellison, A., Lim, O., & Periathiruvadi, S. (2012). Bringing Up Girls in Science (BUGS): The Effectiveness of an Afterschool Environmental Science Program for Increasing Female Students' Interest in Science Careers. *Journal of Science Education and Technology, 21*(1), 46-55. doi:10.1007/s10956-011-9279-2

Wallace, E. W., Perry, J. C., Ferguson, R. L., & Jackson, D. K. (2015). The Careers in Health and Medical Professions Program (CHAMPS): An Impact Study of a University-Based STEM+H Outreach Program. *Journal of Science Education and Technology, 24*(4), 484-495. doi:10.1007/s10956-014-9536-2

Wamser, C. C. (2006). Peer-led team learning in organic chemistry: Effects on student performance, success, and persistence in the course. *Journal of Chemical Education, 83*(10), 1562-1566. doi:DOI 10.1021/ed083p1562

Winkleby, M. A., Ned, J., Ahn, D., Koehler, A., Fagliano, K., & Crump, C. (2014). A Controlled Evaluation of a High School Biomedical Pipeline Program: Design and Methods. *Journal of Science Education and Technology, 23*(1), 138-144. doi:10.1007/s10956-013-9458-4

Xie, Y. C., & Reider, D. (2014). Integration of Innovative Technologies for Enhancing Students' Motivation for Science Learning and Career. *Journal of Science Education and Technology, 23*(3), 370-380. doi:10.1007/s10956-013-9469-1

Yanowitz, K. L. (2016). Students’ Perceptions of the Long-Term Impact of Attending a “CSI Science Camp”. *Journal of Science Education and Technology, 25*(6), 916-928. doi:10.1007/s10956-016-9635-3

Yelamarthi, K., & Mawasha, P. R. (2008). A Pre-Engineering Program for the Under-Represented, Low-Income and/or First Generation College Students to Pursue Higher Education. *Journal of STEM Education: Innovations and Research, 9*(3-4), 5-15.

Yelamarthi, K., & Mawasha, P. R. (2010). A Scholarship Model for Student Recruitment and Retention in STEM Disciplines. *Journal of STEM Education: Innovations and Research, 11*(5-6), 64-71.

Yilmaz, M., Ren, J., Custer, S., & Coleman, J. (2010). Hands-on summer camp to attract K-12 students to engineering fields. *IEEE Transactions on Education, 53*(1), 144-151. doi:10.1109/TE.2009.2026366

Zahorec, J., Haskova, A., & Bilek, M. (2014). Impact of Multimedia Assisted Teaching on Student Attitudes to Science Subjects. *Journal of Baltic Science Education, 13*(3), 361-380.
